# Supplementary material for: YTHDC1 drives senescence evasion in ovarian cancer through m6A-mediated TERT Stabilization
Source: Research Square preprint supplement (doi:10.21203/rs.3.rs-7970749/v1), 2025-11-19

Source data for figure 3E

A2780

ES-2

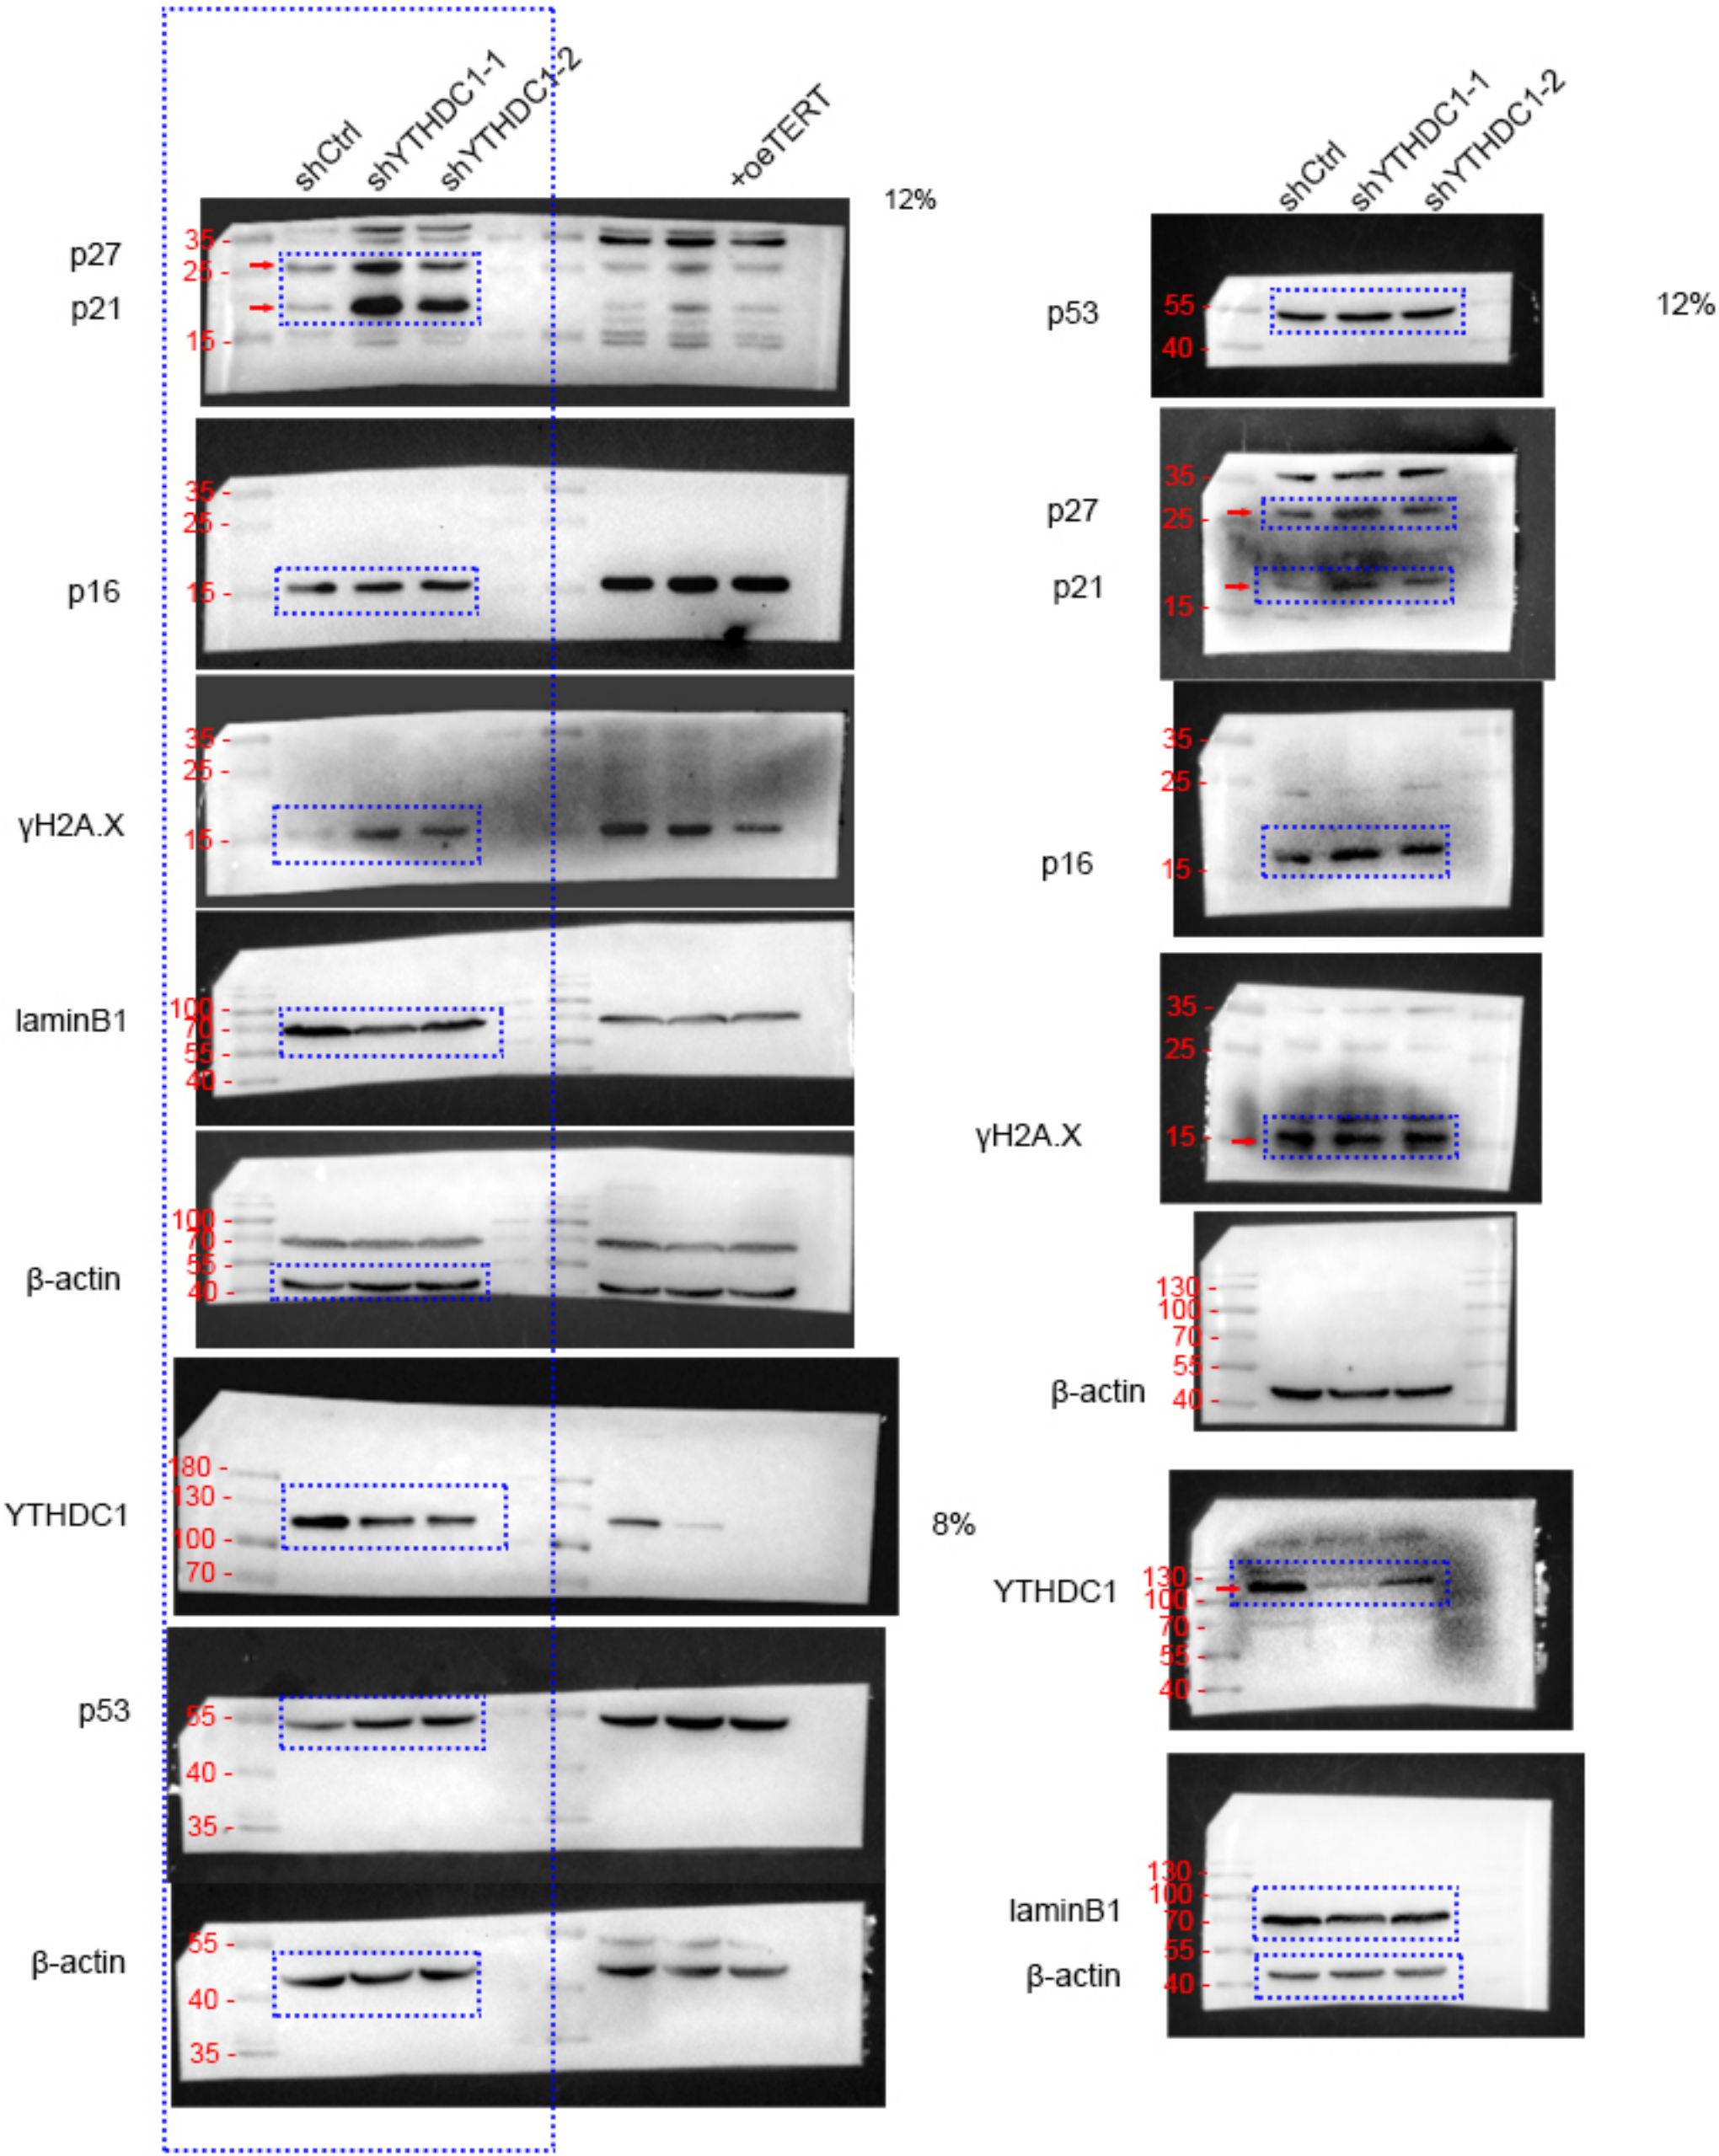

# Source data for figure 4G

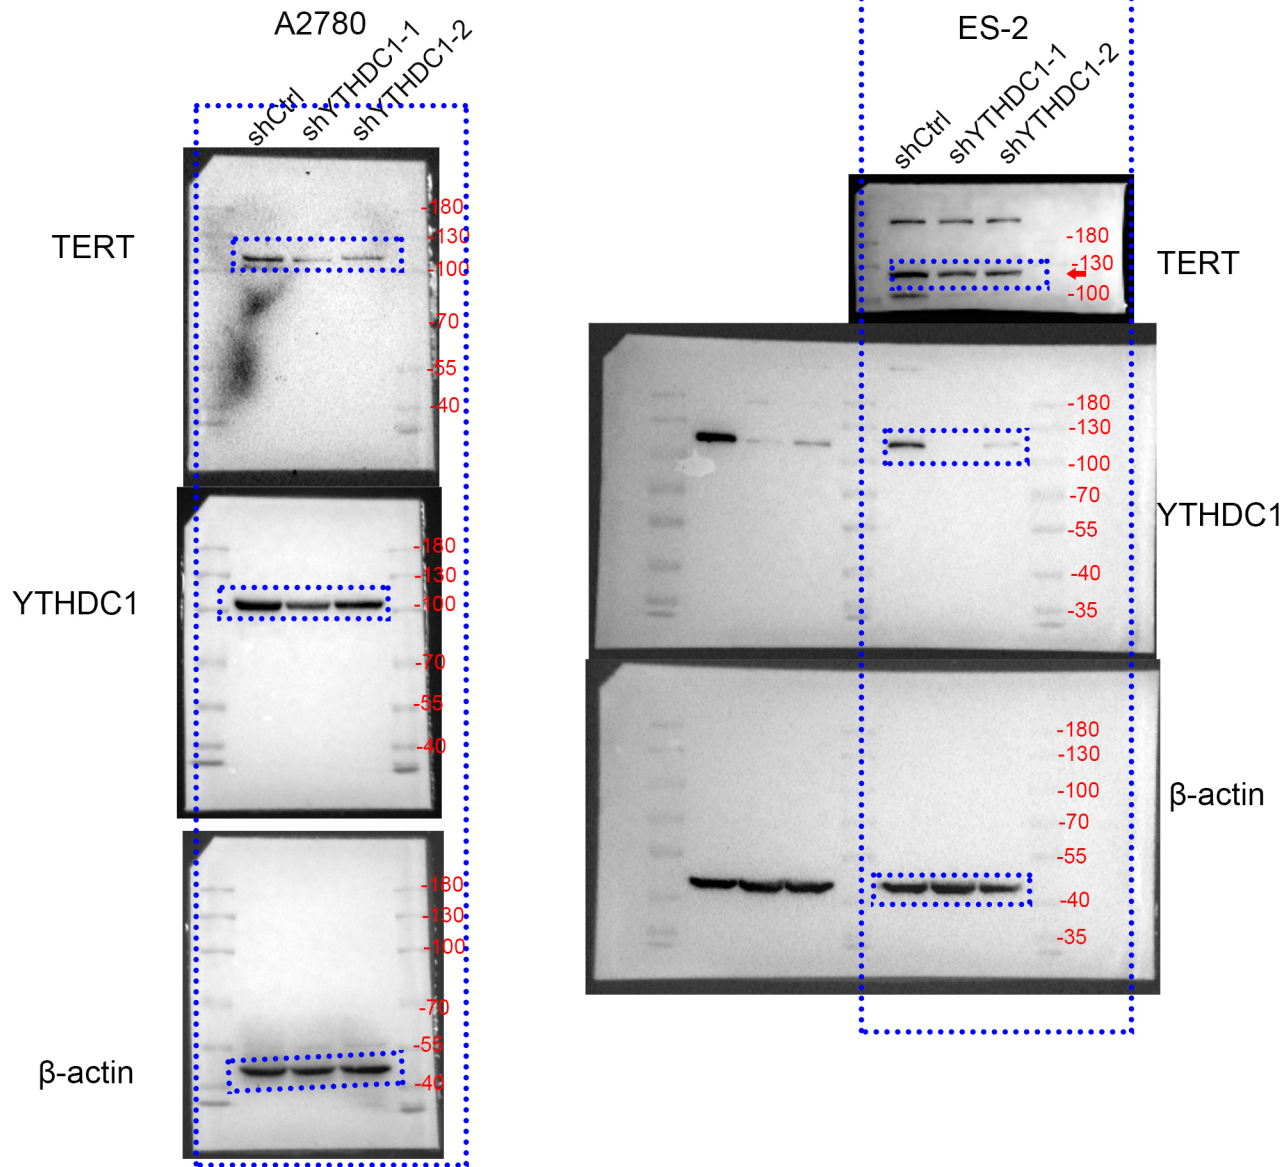

Source data for figure 5D

A2780

ES-2

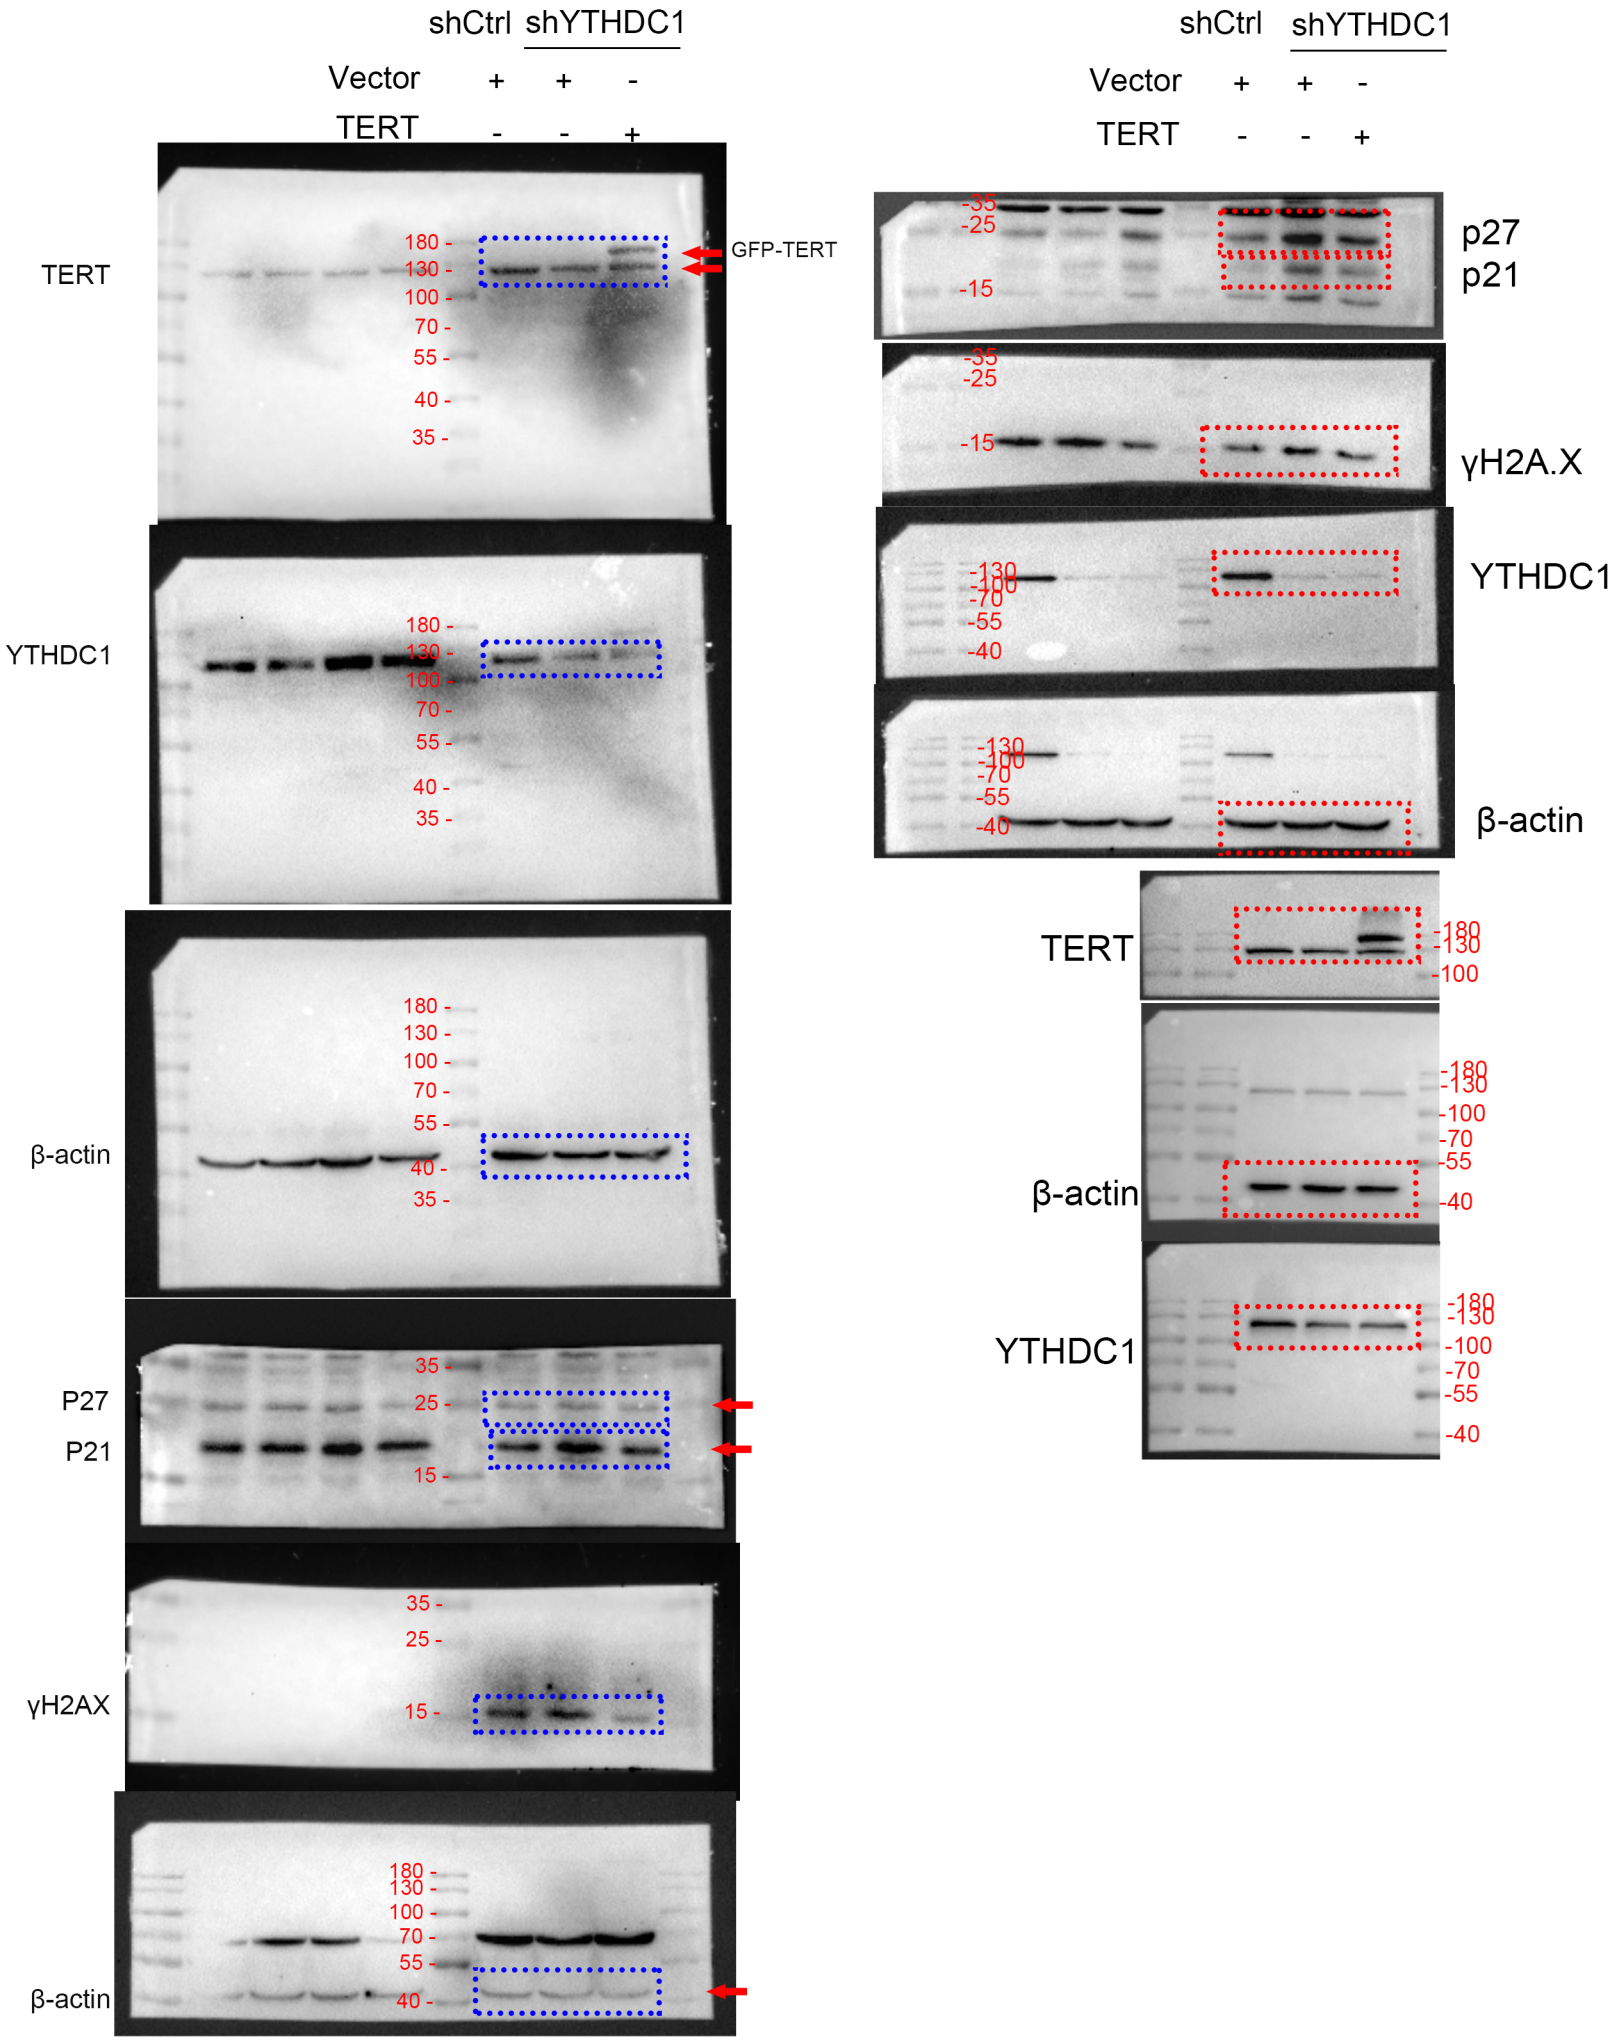



Source data for figure 6B

A2780

|           | shCtrl | shYTHDC1 |   |   |
|-----------|--------|----------|---|---|
| Vector    | +      | +        | - | - |
| YTHDC1-WT | -      | -        | + | - |
| YTHDC1-DM | -      | -        | - | + |

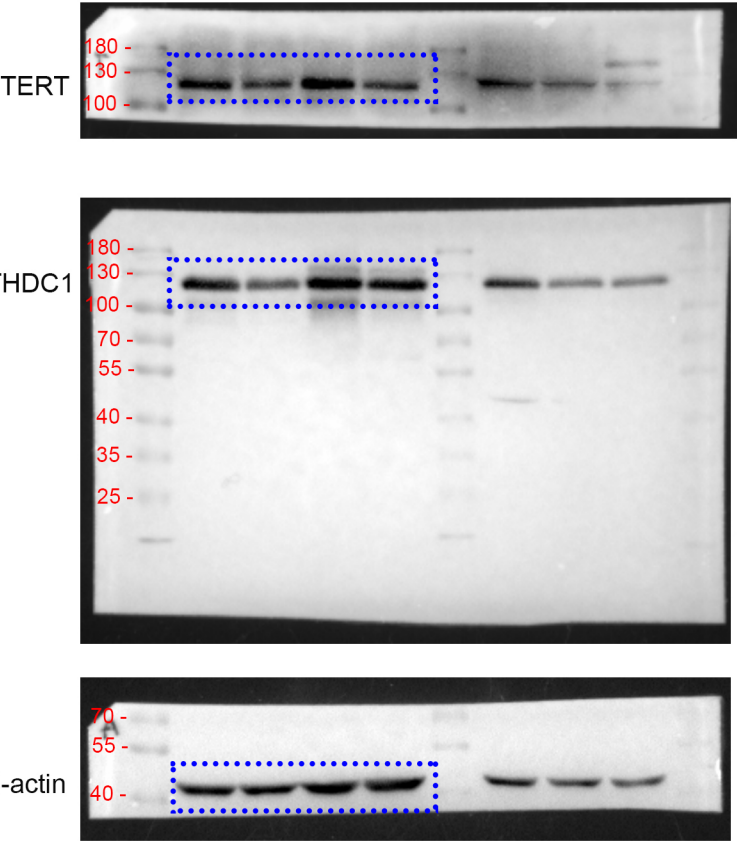

ES-2

|           | shCtrl | shYTHDC1 |   |   |
|-----------|--------|----------|---|---|
| Vector    | +      | +        | - | - |
| YTHDC1-WT | -      | -        | + | - |
| YTHDC1-DM | -      | -        | - | + |

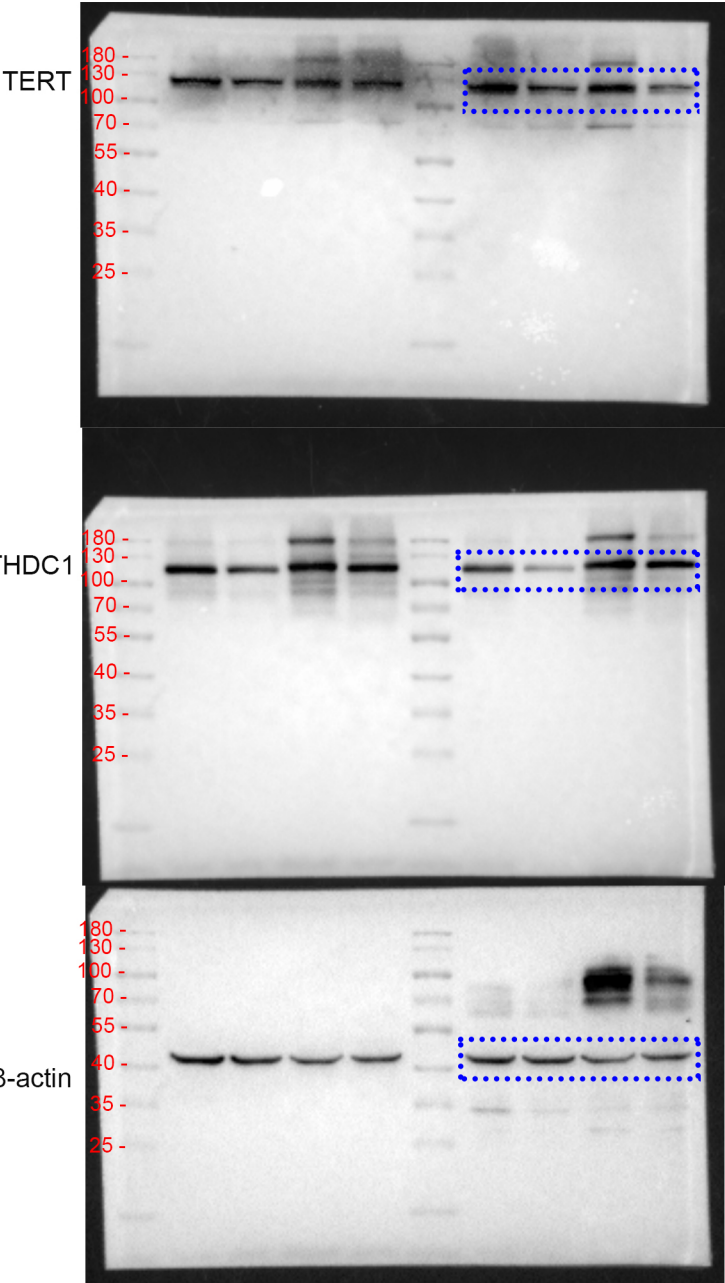



Source data for figure 6F

A2780

|           | shCtrl | shYTHDC1 |   |   |
|-----------|--------|----------|---|---|
| Vector    | +      | +        | - | - |
| YTHDC1-WT | -      | -        | + | - |
| YTHDC1-DM | -      | -        | - | + |

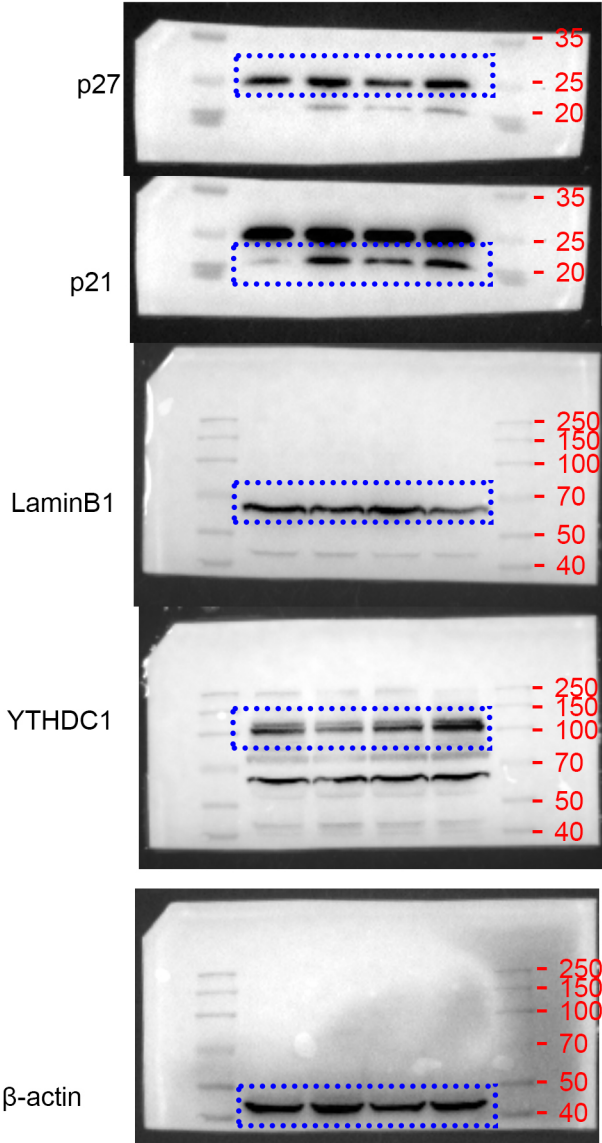

ES-2

|           | shCtrl | shYTHDC1 |   |   |
|-----------|--------|----------|---|---|
| Vector    | +      | +        | - | - |
| YTHDC1-WT | -      | -        | + | - |
| YTHDC1-DM | -      | -        | - | + |

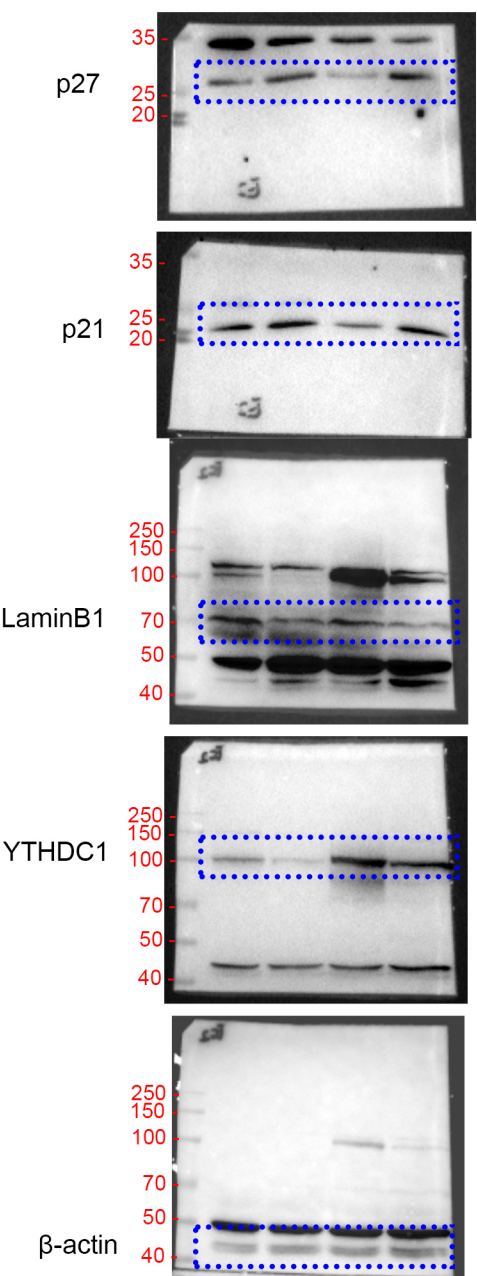

Source data for figure 7B

INPUT  
LacZ Prpbe  
TERT Prpbe

YTHDC1

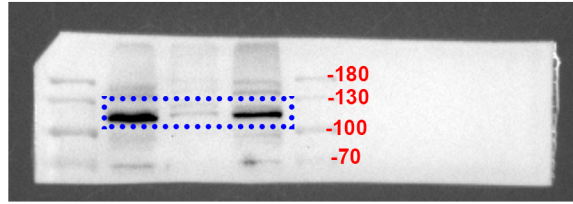

$\beta$ -actin

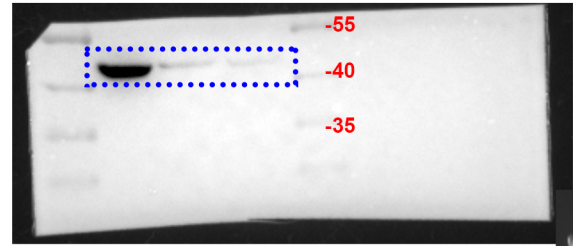

A2780

INPUT  
LacZ Prpbe  
TERT Prpbe

YTHDC1

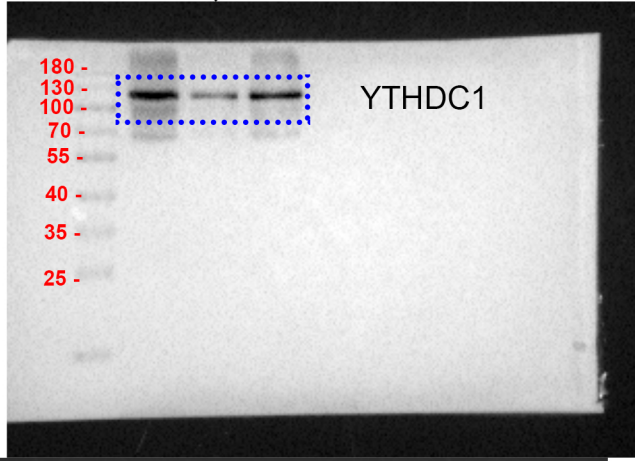

$\beta$ -actin

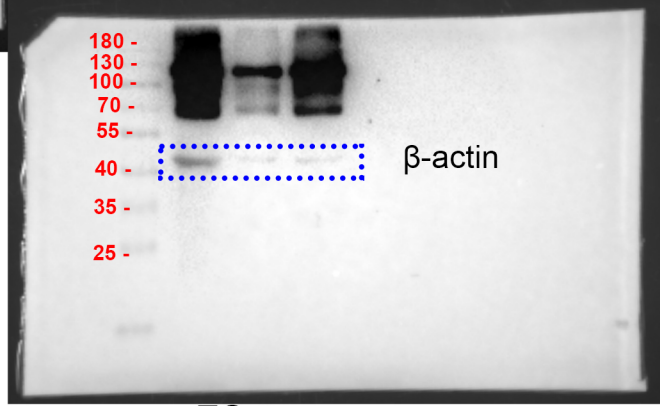

ES-2

Source data for figure 7G

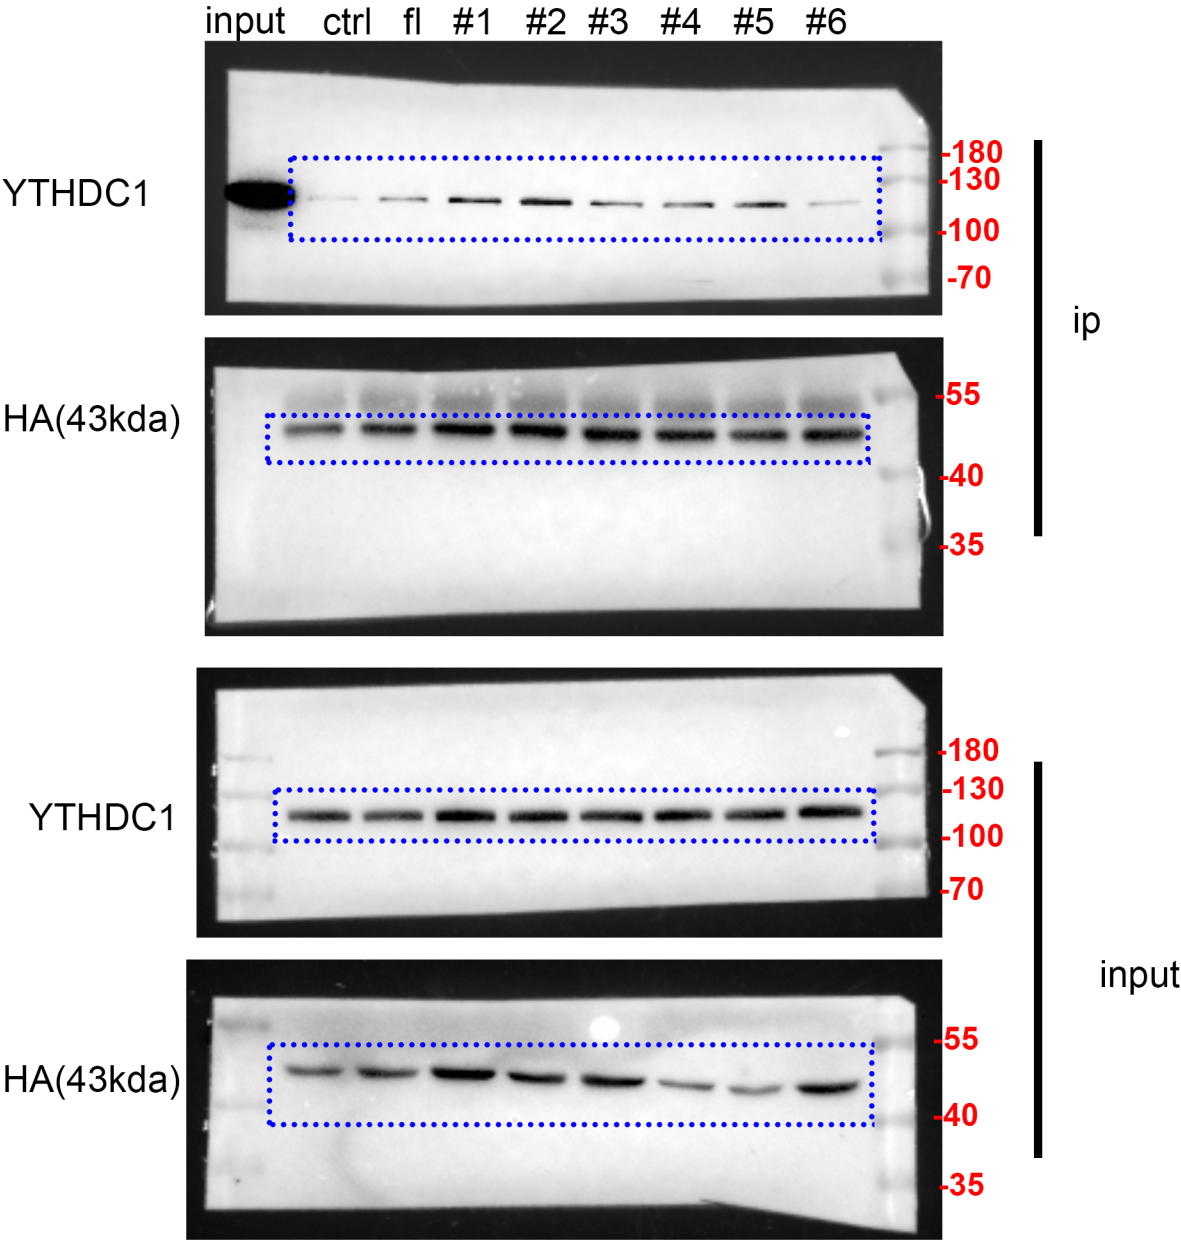



# Source data for figure 8H

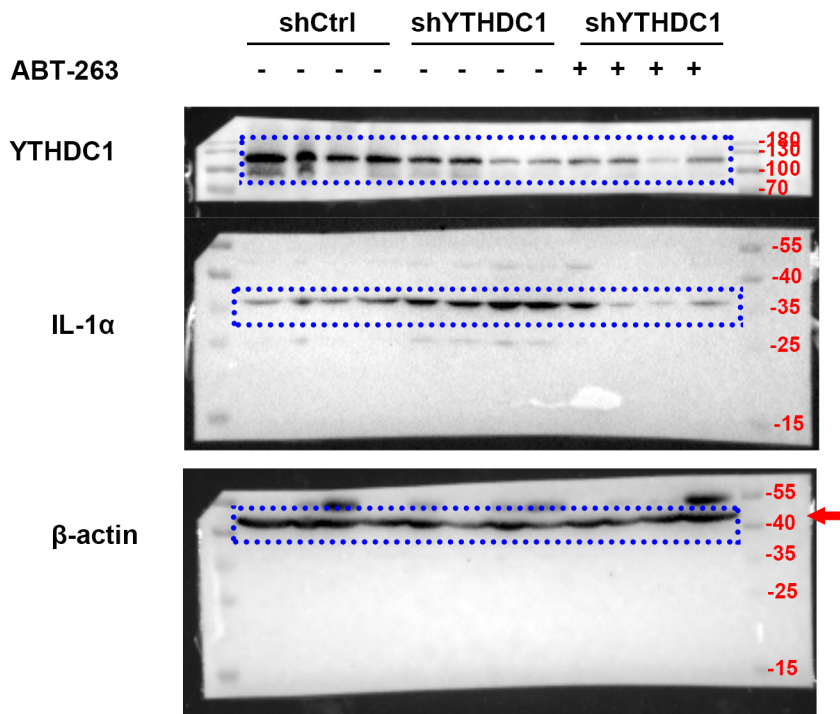

Source data for figure S1A

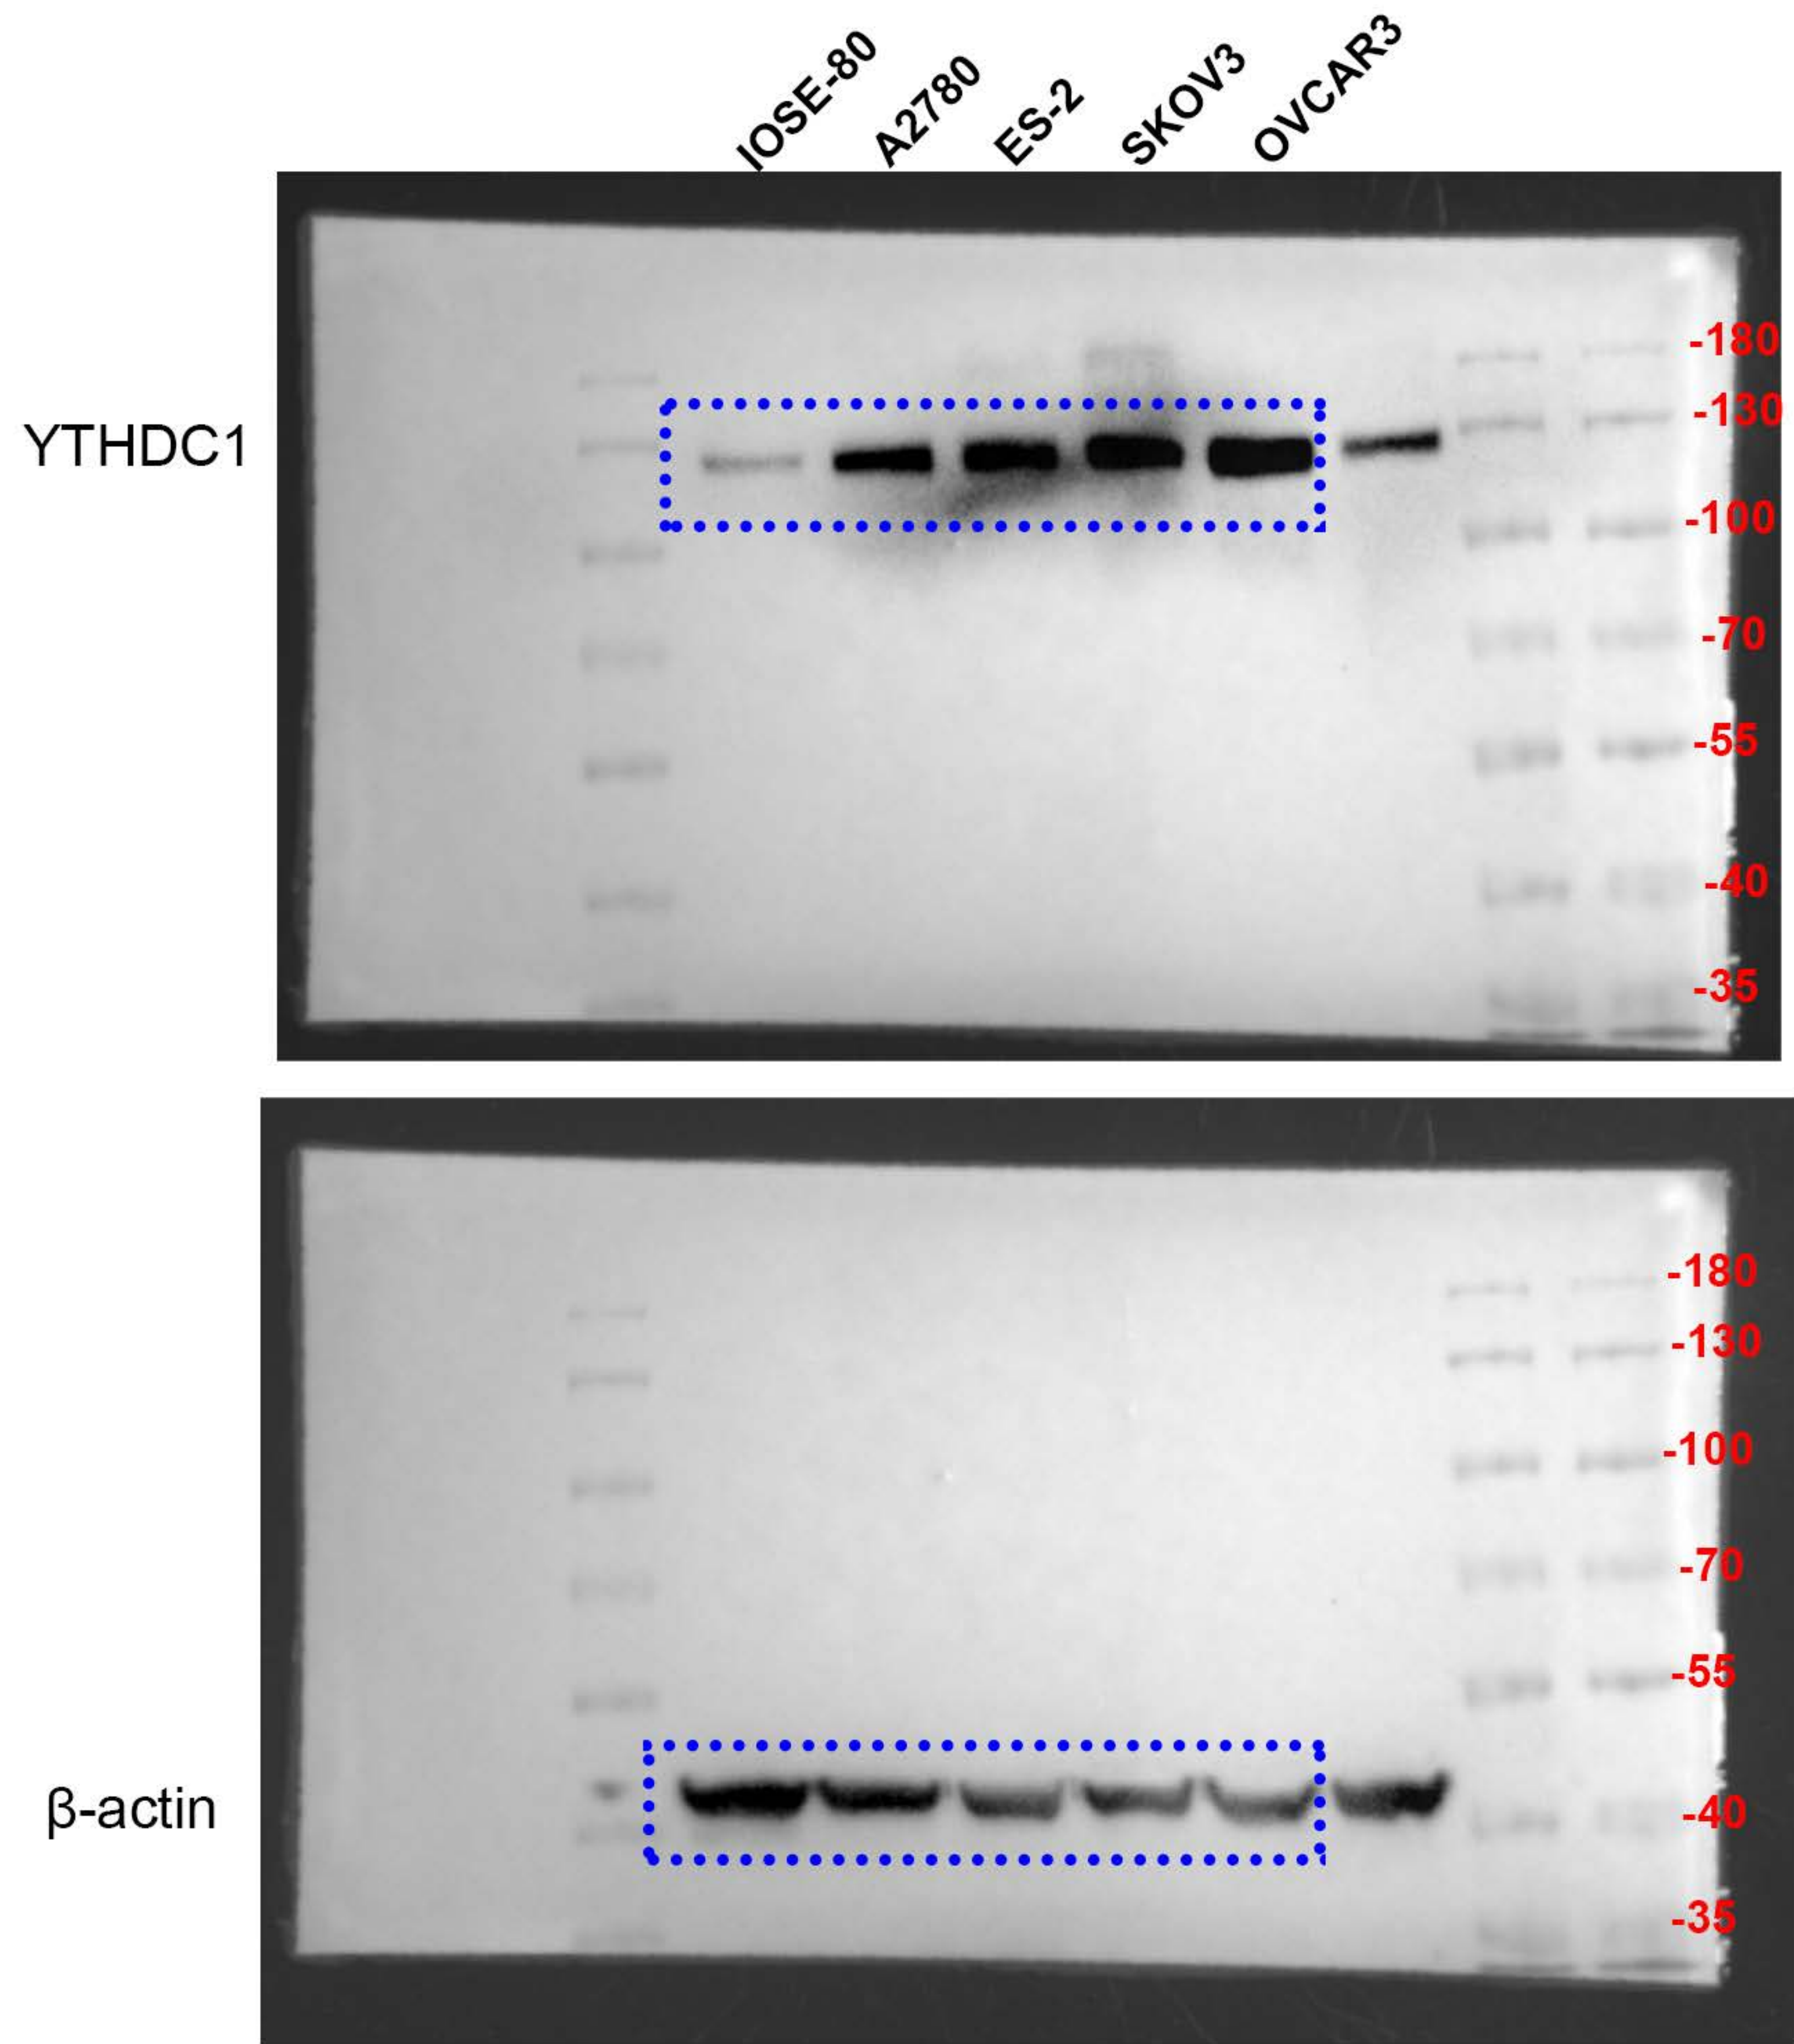

Source data for figure S1B

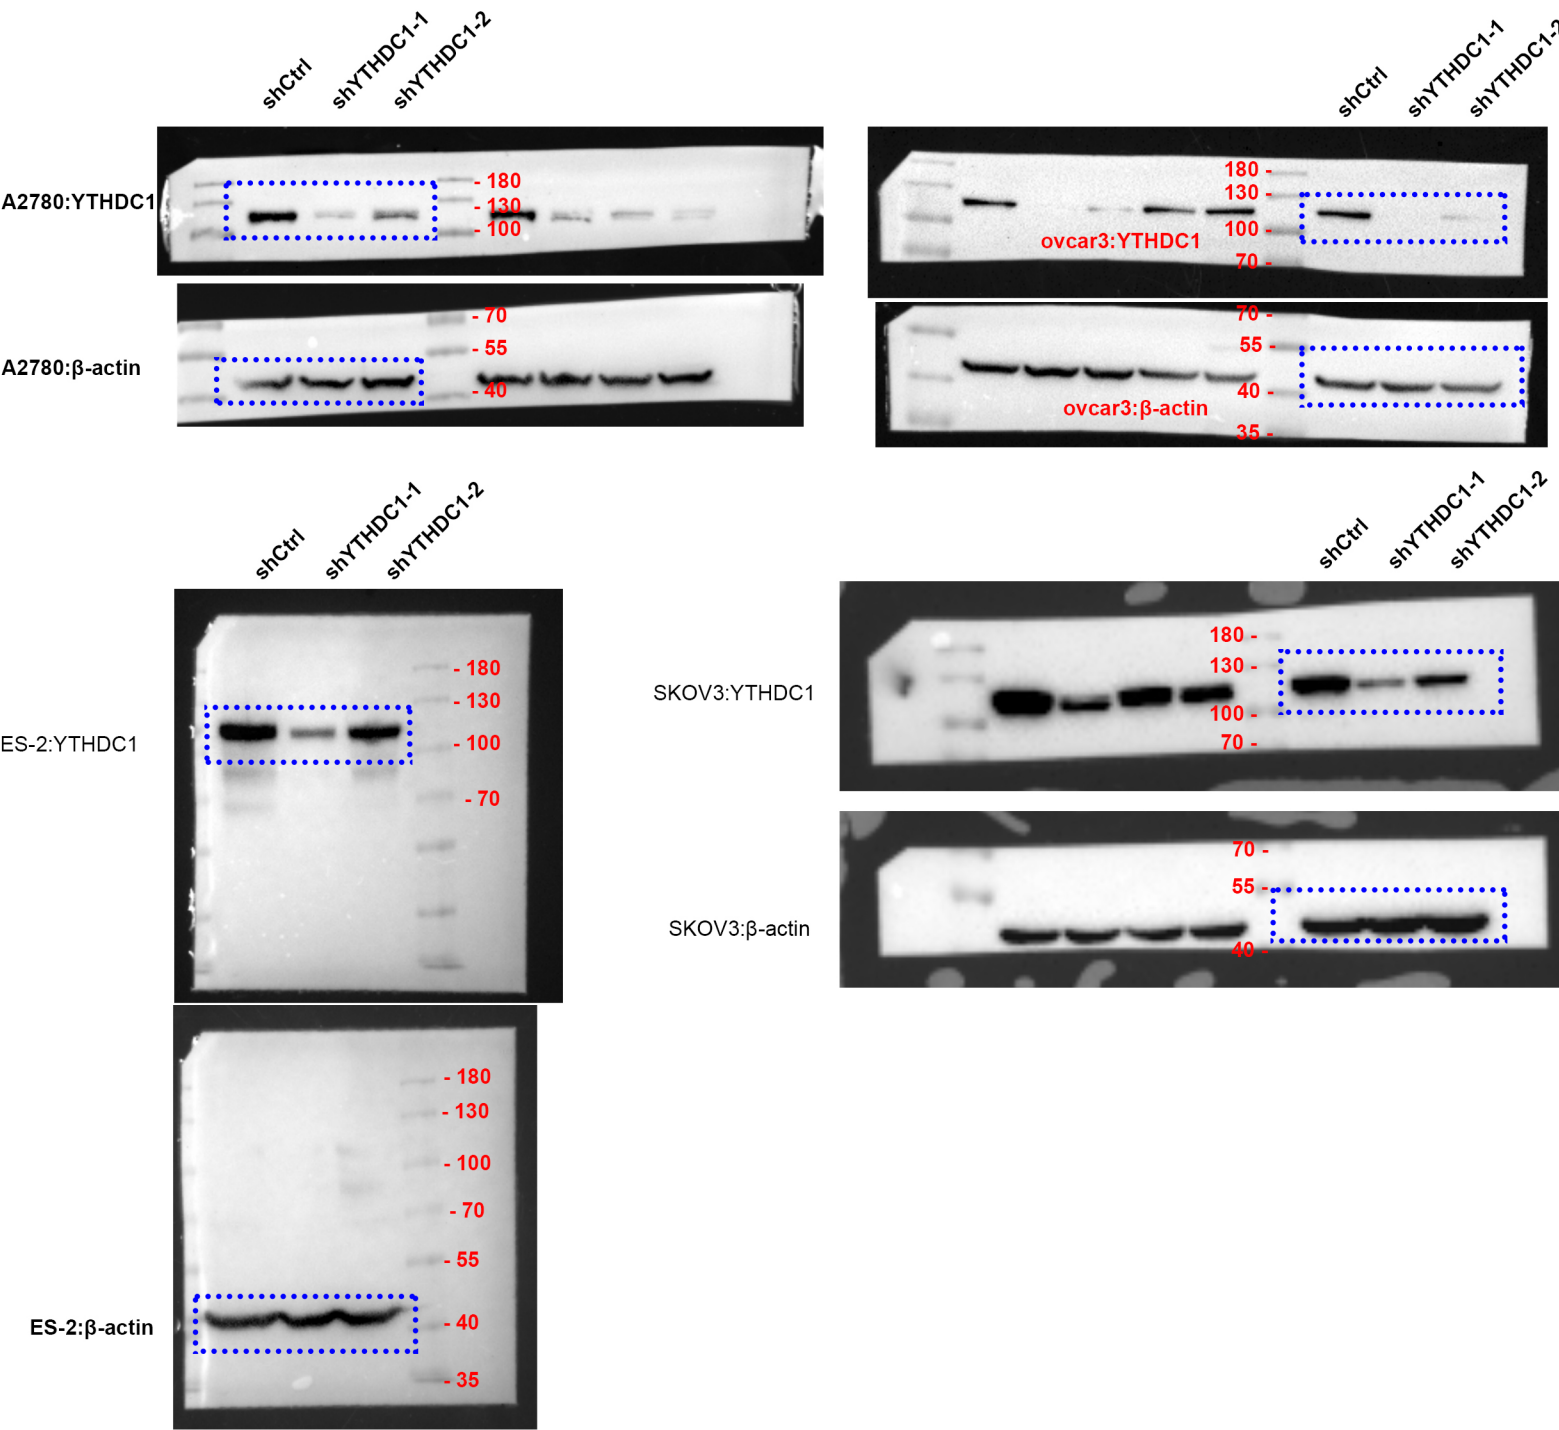

Supplement: Supplementary file 1 [file 2599c9e48a16965490a4568e.pdf]
